# Supplementary material
Source: PubMed Central journal article supplement (PMC3674291)
Supplement: supp_jc.2012-1732_12-1732_Suppl_Tables_1_and_2.pdf [file supp_jc.2012-1732_12-1732_Suppl_Tables_1_and_2.pdf]

**Supplemental Table 1.** Geometric means for urinary concentrations of individual estrogens and estrogen metabolites (EM) and metabolic pathway groups (pmol/mg creatinine) and pathway ratios by overall physical activity, excluding women with anovulatory cycles in the NHSII (N=542).

| Estrogen Metabolites (EM)                          | Overall physical activity (MET-hrs/wk) |       |        |         |         |       | p-trend |
|----------------------------------------------------|----------------------------------------|-------|--------|---------|---------|-------|---------|
|                                                    | <3                                     | 3-8.9 | 9-17.9 | 18-26.9 | 27-41.9 | 42+   |         |
| <b>N</b>                                           | 56                                     | 111   | 135    | 87      | 83      | 70    |         |
| <b>Total EM</b>                                    | 195.2                                  | 193.1 | 203.7  | 195.1   | 167.0   | 200.3 | 0.54    |
| <b>Parent estrogens</b>                            | 42.2                                   | 39.3  | 37.8   | 41.0    | 34.2    | 40.9  | 0.77    |
| Estrone                                            | 29.1                                   | 27.0  | 26.8   | 28.2    | 24.1    | 28.5  | 0.85    |
| Estradiol                                          | 14.8                                   | 13.5  | 13.6   | 14.1    | 11.2    | 13.5  | 0.20    |
| <b>2-Hydroxylation pathway EM</b>                  | 52.1                                   | 54.5  | 68.3   | 63.9    | 54.4    | 64.8  | 0.38    |
| <b>4-Hydroxylation pathway EM</b>                  | 5.3                                    | 5.7   | 6.2    | 6.2     | 5.3     | 6.3   | 0.68    |
| <b>16-Hydroxylation pathway EM</b>                 | 78.3                                   | 72.6  | 71.0   | 68.4    | 57.9    | 71.1  | 0.16    |
| <b>Catechols</b>                                   | 48.7                                   | 51.8  | 64.9   | 60.8    | 52.2    | 62.7  | 0.28    |
| 2-Hydroxyestrone                                   | 36.7                                   | 39.5  | 51.2   | 46.8    | 39.8    | 48.6  | 0.28    |
| 2-Hydroxyestradiol                                 | 4.4                                    | 4.6   | 5.6    | 5.6     | 5.0     | 5.6   | 0.18    |
| 4-Hydroxyestrone                                   | 4.9                                    | 5.5   | 5.7    | 6.1     | 4.8     | 6.1   | 0.56    |
| <b>Methylated catechols</b>                        | 9.8                                    | 9.5   | 10.3   | 9.7     | 8.0     | 9.2   | 0.19    |
| 2-Methoxyestrone                                   | 7.5                                    | 7.1   | 7.9    | 7.3     | 6.0     | 6.9   | 0.20    |
| 2-Methoxyestradiol                                 | 0.65                                   | 0.66  | 0.71   | 0.72    | 0.57    | 0.64  | 0.37    |
| 2-Hydroxyestrone-3-methyl ether                    | 1.15                                   | 1.21  | 1.14   | 1.21    | 0.92    | 0.98  | 0.02    |
| 4-Methoxyestrone                                   | 0.10                                   | 0.14  | 0.10   | 0.12    | 0.11    | 0.12  | 0.92    |
| 4-Methoxyestradiol                                 | 0.04                                   | 0.04  | 0.05   | 0.05    | 0.05    | 0.06  | 0.09    |
| <b>16-Hydroxylation pathway EM</b>                 |                                        |       |        |         |         |       |         |
| 16 $\alpha$ -Hydroxyestrone                        | 13.1                                   | 13.6  | 12.5   | 13.2    | 10.6    | 11.4  | 0.07    |
| Estriol                                            | 37.4                                   | 30.9  | 30.9   | 28.4    | 24.8    | 32.9  | 0.39    |
| 17-Epiestriol                                      | 1.9                                    | 2.0   | 1.7    | 1.8     | 1.5     | 1.7   | 0.21    |
| 16-Ketoestradiol                                   | 15.1                                   | 14.9  | 14.7   | 13.6    | 12.7    | 14.1  | 0.17    |
| 16-Epiestriol                                      | 6.8                                    | 6.9   | 6.7    | 6.3     | 5.6     | 6.6   | 0.23    |
| <b>EM metabolic pathway ratios</b>                 |                                        |       |        |         |         |       |         |
| 2-Pathway EM:Parent estrogens                      | 1.2                                    | 1.4   | 1.7    | 1.5     | 1.6     | 1.6   | 0.09    |
| 2-Pathway catechols:Parent estrogens               | 1.0                                    | 1.1   | 1.5    | 1.2     | 1.3     | 1.3   | 0.05    |
| Methylated 2-pathway catechols:Parent estrogens    | 0.22                                   | 0.23  | 0.25   | 0.23    | 0.23    | 0.22  | 0.28    |
| 2-pathway catechols:Methylated 2-pathway catechols | 4.3                                    | 5.0   | 5.7    | 5.3     | 5.9     | 6.2   | < 0.01  |
| 2-Pathway EM:4-Pathway EM                          | 9.7                                    | 9.5   | 10.6   | 9.8     | 10.4    | 10.4  | 0.53    |
| 2-Pathway EM:16-Pathway EM                         | 0.67                                   | 0.75  | 0.96   | 0.89    | 0.94    | 0.92  | 0.09    |
| 2-Hydroxyestrone/16 $\alpha$ -Hydroxyestrone       | 2.8                                    | 2.9   | 4.0    | 3.5     | 3.8     | 4.3   | 0.02    |
| 4-Pathway EM:Parent estrogens                      | 0.13                                   | 0.15  | 0.16   | 0.15    | 0.15    | 0.15  | 0.50    |
| 4-Pathway EM:16-Pathway EM                         | 0.07                                   | 0.08  | 0.09   | 0.09    | 0.09    | 0.09  | 0.28    |
| 4-Pathway catechols:Methylated 4-pathway catechols | 29.3                                   | 24.6  | 32.9   | 31.8    | 26.3    | 27.1  | 0.80    |
| 16-Pathway EM:Parent EM                            | 1.8                                    | 1.8   | 1.8    | 1.7     | 1.7     | 1.7   | 0.35    |

Adjusted for: age at urine collection, luteal day at collection, first morning urine, BMI (continuous), alcohol consumption, and usual menstrual cycle length  
<sup>†</sup> p<sub>trend</sub> evaluated using the median MET-hrs/wk value for each activity category as a continuous variable

**Supplemental Table 2.** Geometric means for urinary concentrations of individual estrogens and estrogen metabolites (EM) and metabolic pathway groups (pmol/mg creatinine) and pathway ratios by overall physical activity and body mass index (BMI) category in the NHSII (N=603).

| EM Measures                                        | BMI ≤ 25 kg/m <sup>2</sup>    |       |        |         |         |       |                      | BMI > 25 kg/m <sup>2</sup>    |       |        |         |         |       |                      |
|----------------------------------------------------|-------------------------------|-------|--------|---------|---------|-------|----------------------|-------------------------------|-------|--------|---------|---------|-------|----------------------|
|                                                    | Overall activity (MET-hrs/wk) |       |        |         |         |       |                      | Overall activity (MET-hrs/wk) |       |        |         |         |       |                      |
|                                                    | <3                            | 3-8.9 | 9-17.9 | 18-26.9 | 27-41.9 | 42+   | p-trend <sup>1</sup> | <3                            | 3-8.9 | 9-17.9 | 18-26.9 | 27-41.9 | 42+   | p-trend <sup>1</sup> |
| <b>N</b>                                           | 28                            | 74    | 90     | 59      | 62      | 64    |                      | 32                            | 53    | 58     | 37      | 30      | 16    |                      |
| <b>Total EM</b>                                    | 197.7                         | 222.2 | 218.2  | 219.4   | 182.7   | 213.7 | 0.47                 | 190.2                         | 189.6 | 187.8  | 180.3   | 172.8   | 179.6 | 0.44                 |
| <b>Parent estrogens</b>                            | 40.8                          | 45.0  | 38.9   | 46.1    | 36.2    | 41.8  | 0.58                 | 46.3                          | 40.8  | 39.2   | 42.7    | 37.1    | 33.6  | 0.13                 |
| Estrone                                            | 27.1                          | 30.6  | 27.6   | 30.8    | 25.2    | 28.0  | 0.44                 | 30.4                          | 26.2  | 24.7   | 28.4    | 24.7    | 23.0  | 0.30                 |
| Estradiol                                          | 13.9                          | 14.8  | 13.4   | 15.0    | 11.5    | 13.5  | 0.26                 | 16.5                          | 13.3  | 13.9   | 14.7    | 11.9    | 10.8  | 0.04                 |
| <b>2-Hydroxylation pathway EM</b>                  | 56.2                          | 70.9  | 79.1   | 71.7    | 67.4    | 75.3  | 0.62                 | 49.8                          | 49.4  | 60.3   | 57.0    | 54.2    | 49.4  | 0.89                 |
| <b>4-Hydroxylation pathway EM</b>                  | 4.3                           | 6.7   | 6.3    | 6.6     | 5.7     | 6.8   | 0.47                 | 5.6                           | 5.5   | 5.9    | 5.3     | 4.5     | 4.1   | 0.11                 |
| <b>16-Hydroxylation pathway EM</b>                 | 82.9                          | 75.9  | 72.8   | 77.1    | 59.5    | 69.4  | 0.10                 | 70.7                          | 74.4  | 63.4   | 63.3    | 59.6    | 57.5  | 0.10                 |
| <b>Catechols</b>                                   | 51.1                          | 66.7  | 73.5   | 66.3    | 63.8    | 72.5  | 0.43                 | 46.1                          | 46.4  | 58.7   | 53.7    | 49.5    | 47.8  | 0.86                 |
| 2-Hydroxyestrone                                   | 40.8                          | 51.3  | 59.7   | 51.7    | 50.1    | 56.3  | 0.53                 | 34.0                          | 35.0  | 43.9   | 42.1    | 38.5    | 37.8  | 0.63                 |
| 2-Hydroxyestradiol                                 | 4.4                           | 5.7   | 6.1    | 6.2     | 6.1     | 6.3   | 0.25                 | 4.3                           | 3.9   | 4.9    | 4.6     | 4.8     | 3.8   | 0.90                 |
| 4-Hydroxyestrone                                   | 3.8                           | 6.4   | 5.9    | 6.6     | 5.1     | 6.8   | 0.33                 | 5.1                           | 5.6   | 5.4    | 4.9     | 3.9     | 3.7   | 0.05                 |
| <b>Methylated catechols</b>                        | 9.8                           | 12.4  | 11.7   | 12.1    | 9.7     | 10.7  | 0.25                 | 10.0                          | 8.9   | 8.9    | 8.4     | 8.3     | 6.8   | 0.10                 |
| 2-Methoxyestrone                                   | 7.5                           | 9.5   | 9.1    | 9.0     | 7.4     | 8.1   | 0.22                 | 7.5                           | 6.5   | 6.8    | 6.1     | 6.3     | 5.2   | 0.16                 |
| 2-Methoxyestradiol                                 | 0.59                          | 0.82  | 0.76   | 0.87    | 0.68    | 0.75  | 0.82                 | 0.76                          | 0.63  | 0.68   | 0.64    | 0.54    | 0.41  | 0.01                 |
| 2-Hydroxyestrone-3-methyl ether                    | 1.12                          | 1.49  | 1.23   | 1.34    | 1.05    | 1.16  | 0.09                 | 1.24                          | 1.16  | 1.07   | 1.15    | 0.99    | 0.68  | 0.02                 |
| 4-Methoxyestrone                                   | 0.14                          | 0.19  | 0.11   | 0.19    | 0.15    | 0.16  | 0.56                 | 0.08                          | 0.13  | 0.12   | 0.09    | 0.14    | 0.12  | 0.61                 |
| 4-Methoxyestradiol                                 | 0.04                          | 0.05  | 0.05   | 0.06    | 0.06    | 0.06  | 0.22                 | 0.04                          | 0.03  | 0.05   | 0.04    | 0.04    | 0.06  | 0.14                 |
| <b>16-hydroxylation pathway EM</b>                 |                               |       |        |         |         |       |                      |                               |       |        |         |         |       |                      |
| 16α-Hydroxyestrone                                 | 13.4                          | 14.5  | 12.2   | 15.0    | 10.9    | 11.1  | 0.06                 | 11.4                          | 12.2  | 11.2   | 11.0    | 10.3    | 7.0   | 0.02                 |
| Estriol                                            | 39.0                          | 30.8  | 32.3   | 30.4    | 25.3    | 30.7  | 0.26                 | 35.5                          | 33.4  | 29.4   | 30.2    | 26.5    | 36.6  | 0.62                 |
| 17-Epiestriol                                      | 1.82                          | 1.73  | 1.61   | 2.02    | 1.39    | 1.59  | 0.42                 | 1.76                          | 1.96  | 1.39   | 1.43    | 1.27    | 1.17  | 0.04                 |
| 16-Ketoestradiol                                   | 17.5                          | 16.3  | 14.7   | 15.4    | 13.3    | 13.6  | 0.03                 | 12.3                          | 13.2  | 13.4   | 12.3    | 12.3    | 11.2  | 0.37                 |
| 16-Epiestriol                                      | 6.7                           | 6.7   | 6.5    | 6.7     | 5.5     | 5.9   | 0.05                 | 6.6                           | 7.2   | 6.2    | 6.0     | 5.9     | 6.6   | 0.38                 |
| <b>Metabolic pathway ratios</b>                    |                               |       |        |         |         |       |                      |                               |       |        |         |         |       |                      |
| 2-Pathway EM:Parent estrogens                      | 1.3                           | 1.5   | 1.8    | 1.5     | 1.8     | 1.7   | 0.13                 | 1.0                           | 1.1   | 1.5    | 1.2     | 1.5     | 1.5   | 0.02                 |
| 2-Pathway catechols:Parent estrogens               | 1.1                           | 1.2   | 1.5    | 1.2     | 1.5     | 1.4   | 0.09                 | 0.8                           | 0.9   | 1.2    | 1.0     | 1.3     | 1.2   | 0.01                 |
| Methylated 2-pathway catechols:Parent estrogens    | 0.23                          | 0.25  | 0.27   | 0.25    | 0.25    | 0.25  | 0.75                 | 0.20                          | 0.19  | 0.22   | 0.18    | 0.22    | 0.19  | 0.96                 |
| 2-pathway catechols:Methylated 2-pathway catechols | 4.8                           | 4.9   | 5.7    | 5.1     | 6.1     | 6.1   | 0.01                 | 3.9                           | 4.7   | 5.4    | 5.1     | 5.5     | 6.5   | 0.01                 |
| 2-Pathway EM:4-Pathway EM                          | 12.9                          | 10.3  | 12.2   | 10.6    | 11.6    | 10.8  | 0.71                 | 8.5                           | 8.2   | 9.5    | 9.6     | 12.2    | 11.7  | 0.02                 |
| 2-Pathway EM:16-Pathway EM                         | 0.68                          | 0.93  | 1.07   | 0.93    | 1.13    | 1.08  | 0.11                 | 0.69                          | 0.64  | 0.90   | 0.81    | 0.92    | 0.85  | 0.17                 |
| 2-Hydroxyestrone:16α-Hydroxyestrone                | 3.0                           | 3.5   | 4.8    | 3.4     | 4.6     | 5.0   | 0.04                 | 3.0                           | 3.0   | 3.7    | 3.9     | 3.8     | 5.5   | 0.03                 |
| 4-Pathway EM:Parent estrogens                      | 0.11                          | 0.15  | 0.15   | 0.14    | 0.16    | 0.16  | 0.21                 | 0.12                          | 0.13  | 0.15   | 0.12    | 0.12    | 0.12  | 0.67                 |
| 4-Pathway EM:16-Pathway EM                         | 0.05                          | 0.09  | 0.09   | 0.09    | 0.10    | 0.10  | 0.10                 | 0.08                          | 0.08  | 0.09   | 0.08    | 0.08    | 0.07  | 0.67                 |
| 4-Pathway catechols:Methylated 4-pathway catechols | 19.5                          | 22.1  | 29.6   | 22.3    | 21.3    | 24.9  | 0.92                 | 34.5                          | 28.2  | 25.1   | 31.4    | 20.5    | 15.1  | 0.04                 |
| 16-Pathway EM:Parent EM                            | 2.0                           | 1.7   | 1.8    | 1.7     | 1.6     | 1.7   | 0.39                 | 1.4                           | 1.7   | 1.6    | 1.5     | 1.5     | 1.6   | 0.96                 |

Adjusted for: age at urine collection, luteal day at collection, first morning urine, alcohol consumption, and usual menstrual cycle length

<sup>1</sup> p<sub>trend</sub> evaluated using the median MET-hrs/wk value for each activity category as a continuous variable
